# Supplementary material for: Towards High-Resolution Land-Cover Classification of Greenland: A Case Study Covering Kobbefjord, Disko and Zackenberg
Source: MDPI journal article supplement (doi:10.3390/rs13183559), 2021-09-07
Supplement: s1 [file s1]

Archive with 1 entries (1 files):
- remotesensing-1359349-supplementary.pdf
