# Supplementary material for: Towards High-Resolution Land-Cover Classification of Greenland: A Case Study Covering Kobbefjord, Disko and Zackenberg
Source: MDPI journal article supplement (doi:10.3390/rs13183559), 2021-09-07
Supplement: s1 [file s1 › remotesensing-1359349-supplementary.pdf]

# Supplementary Material: Towards high-resolution land-cover classification of Greenland: a case study covering Kobbefjord, Disko and Zackenberg

Daniel Alexander Rudd <sup>1,2</sup>, Mojtaba Karami <sup>3</sup> and Rasmus Fensholt <sup>1\*</sup>

<sup>1</sup> Department of Geosciences and Natural Resource Management, University of Copenhagen

<sup>2</sup> Department of Bioscience, Aarhus University, 4000 Roskilde, Denmark

<sup>3</sup> BASF Digital Farming GmbH, Im Zollhafen 24, Cologne 50678, Germany

**Table S1:** Sentinel-2 spatial and spectral resolution. \*not used in this study

| Band # and description | Centre wavelength<br>(nm) | Bandwidth<br>(nm) | Spatial resolution<br>(m) |
|------------------------|---------------------------|-------------------|---------------------------|
| B1 Coastal aerosol*    | 443                       | 20                | 60                        |
| <b>B2 Blue</b>         | 490                       | 65                | 10                        |
| <b>B3 Green</b>        | 560                       | 35                | 10                        |
| <b>B4 Red</b>          | 665                       | 30                | 10                        |
| <b>B5 Red-edge 1</b>   | 705                       | 15                | 20                        |
| <b>B6 Red-edge 2</b>   | 740                       | 15                | 20                        |
| <b>B7 Red-edge 3</b>   | 783                       | 20                | 20                        |
| <b>B8 NIR</b>          | 842                       | 115               | 10                        |
| <b>B8A Narrow NIR</b>  | 865                       | 20                | 20                        |
| B9 Water vapor*        | 945                       | 20                | 60                        |
| B10 Cirrus*            | 1374                      | 30                | 60                        |
| <b>B11 SWIR 1</b>      | 1610                      | 90                | 20                        |
| <b>B12 SWIR 2</b>      | 2190                      | 180               | 20                        |

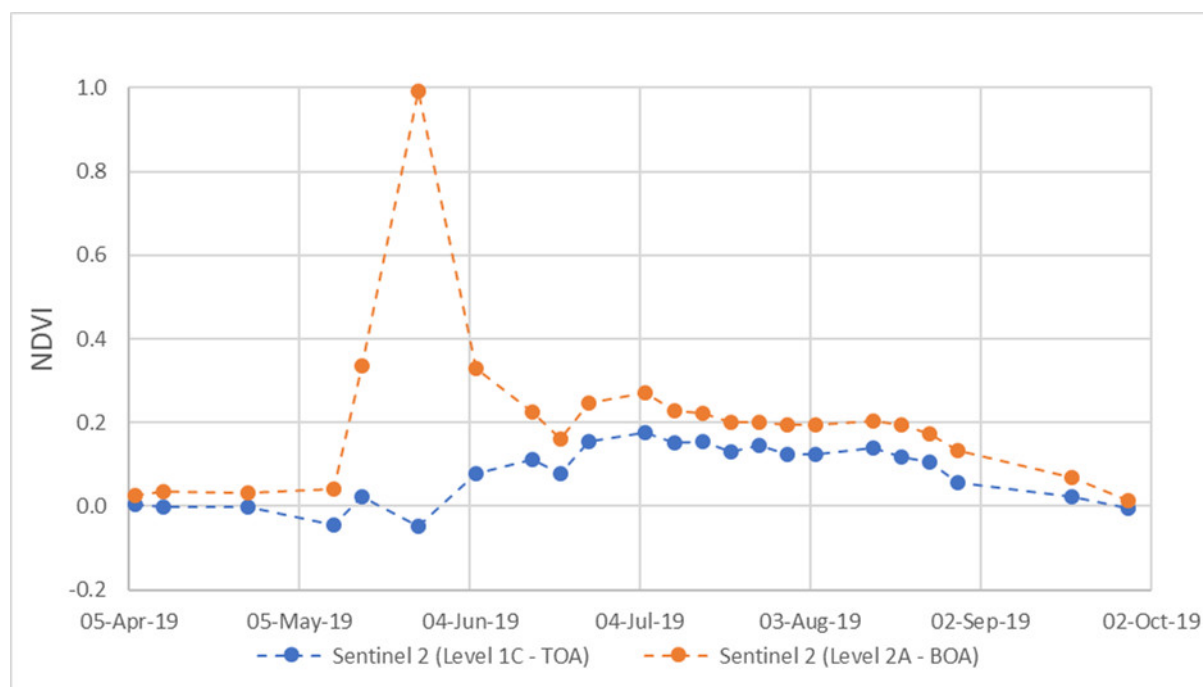

Figure S1: Sentinel-2 Level 1C vs. Level 2A. NDVI time-series of a pixel in Zackenberg (NE Greenland). As observed, the L2A product shows an obvious error of NDVI reaching the value 1. This was observed on several occasions, and most often in the time-frame where snowmelt occurred. As this was not just the case of a single image, it was found that using the atmospherically corrected product was not feasible for the classification approach based on phenology metrics.

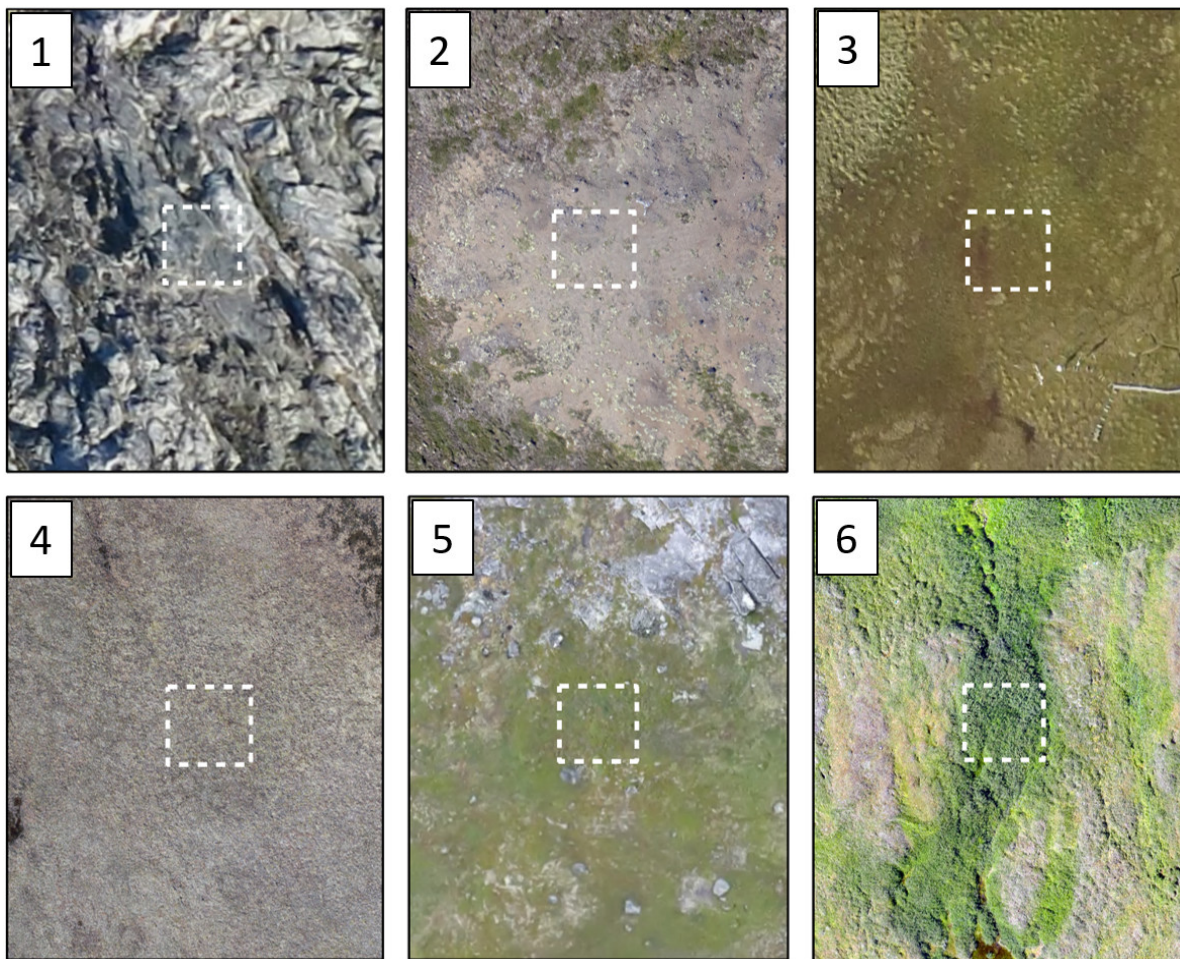

**Figure S2:** Examples of the six land cover classes. The background is from high-resolution drone images. The white squares represent the spatial extent of one Sentinel-2 pixel (10 m).

- (1) Barren ground – Kobbefjord.
- (2) Abrasion surface – Disko.
- (3) Fen – Zackenberg.
- (4) Dry heath and Grassland – Zackenberg.
- (5) Wet heath – Kobbefjord.
- (6) Tall shrubs and Copse – Disko.

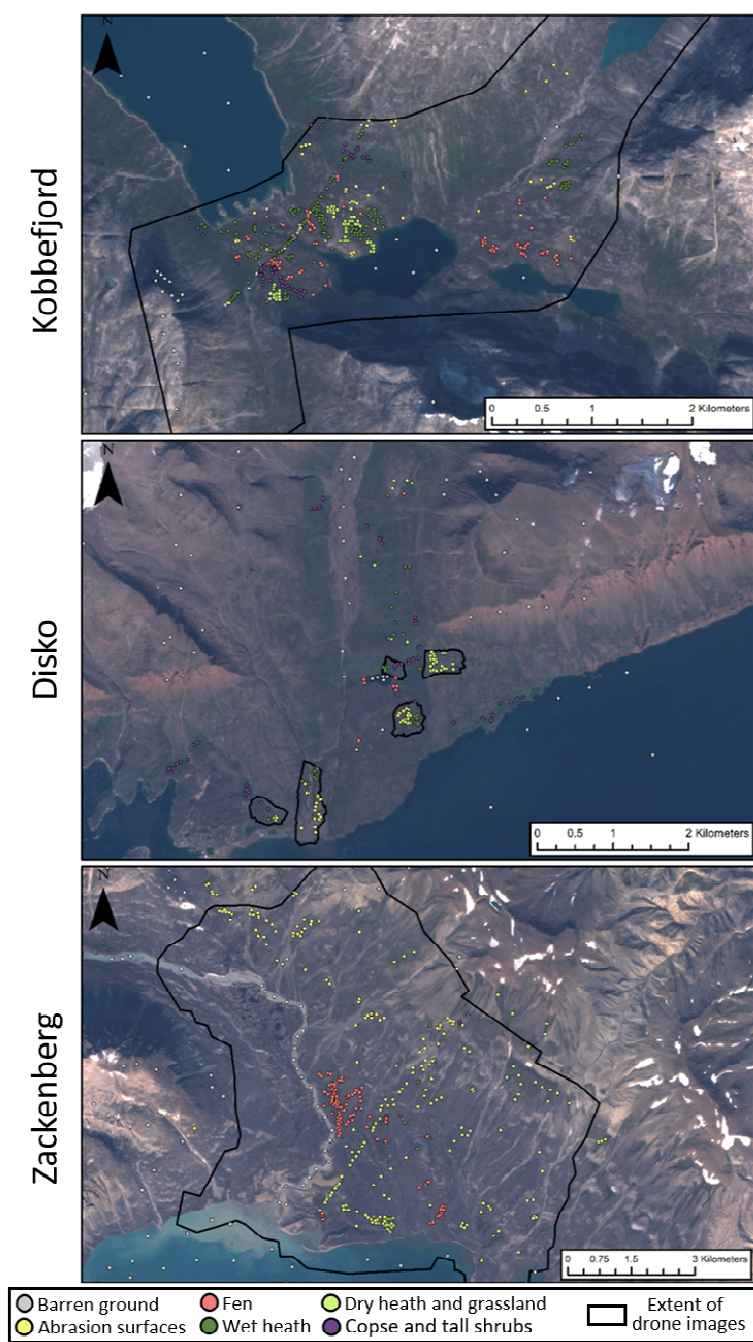

**Figure S3:** Spatial distribution of the ground reference data.

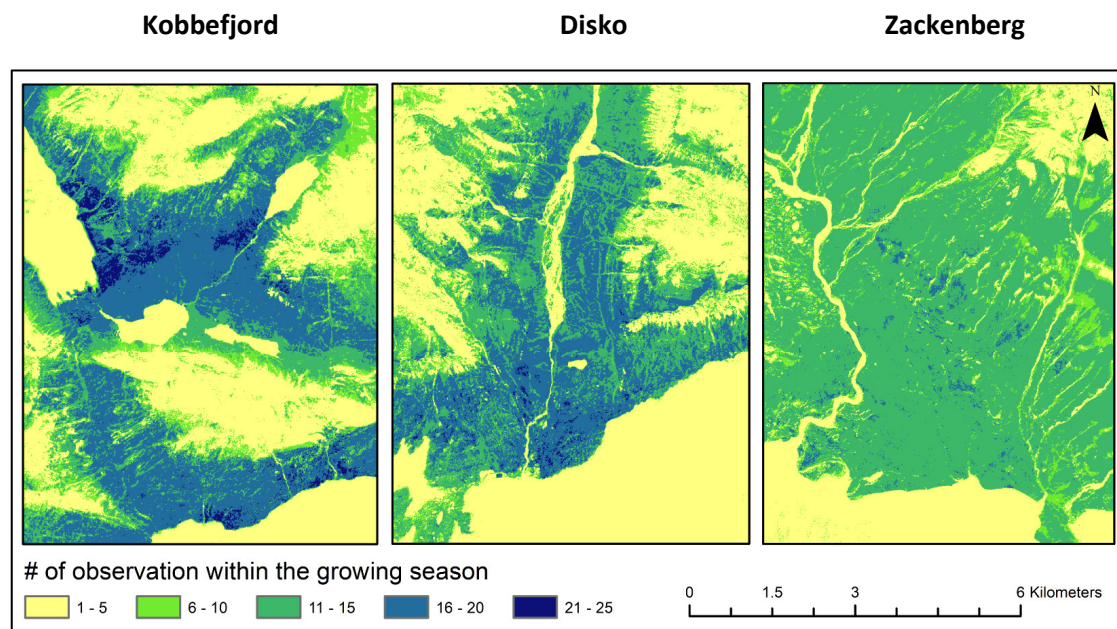

**Figure S4:** Per pixel number of observations within the growing season.

**Table S2:** Overview of all features applied for the RF classification.

| Phenology                | Variations                                  | Number of features |
|--------------------------|---------------------------------------------|--------------------|
| Date of peak             | DOY                                         | 1                  |
| LOS (Days)               | Days                                        | 1                  |
| SOS                      | DOY, NDVI and slope                         | 3                  |
| EOS                      | DOY, NDVI and slope                         | 3                  |
| TI-NDVI                  | Sum                                         | 1                  |
| <b><u>Indicies</u></b>   |                                             |                    |
| NDVI                     | Max, median, min and SD                     | 4                  |
| NDVI (Narrow NIR)        | Max, median, min and SD                     | 4                  |
| VI RE1                   | Max, median, min and SD                     | 4                  |
| VI RE2                   | Max, median, min and SD                     | 4                  |
| VI RE3                   | Max, median, min and SD                     | 4                  |
| NDMI                     | Max, median, min and SD                     | 4                  |
| NBR                      | Max, median, min and SD                     | 4                  |
| NBR2                     | Max, median, min and SD                     | 4                  |
| ND RE1 & RE2             | Max, median, min and SD                     | 4                  |
| ND RE1 & RE3             | Max, median, min and SD                     | 4                  |
| ND RE2 & RE3             | Max, median, min and SD                     | 4                  |
| EVI                      | Max, median, min and SD                     | 4                  |
| SAVI                     | Max, median, min and SD                     | 4                  |
| NDWI                     | Max, median, min and SD                     | 4                  |
| <b><u>Bands</u></b>      |                                             |                    |
| Blue                     | Median                                      | 1                  |
| Green                    | Median                                      | 1                  |
| RED                      | Median                                      | 1                  |
| Red-edge 1               | Median                                      | 1                  |
| Red-edge 2               | Median                                      | 1                  |
| Red-edge 3               | Median                                      | 1                  |
| NIR                      | Median                                      | 1                  |
| Narrow NIR               | Median                                      | 1                  |
| SWIR 1                   | Median                                      | 1                  |
| SWIR 2                   | Median                                      | 1                  |
| <b><u>Topography</u></b> |                                             |                    |
| Elevation                | Meters                                      | 1                  |
| Slope                    | Original, 100 m smoothed and 200 m smoothed | 3                  |
| <b>Total</b>             |                                             | <b>79</b>          |

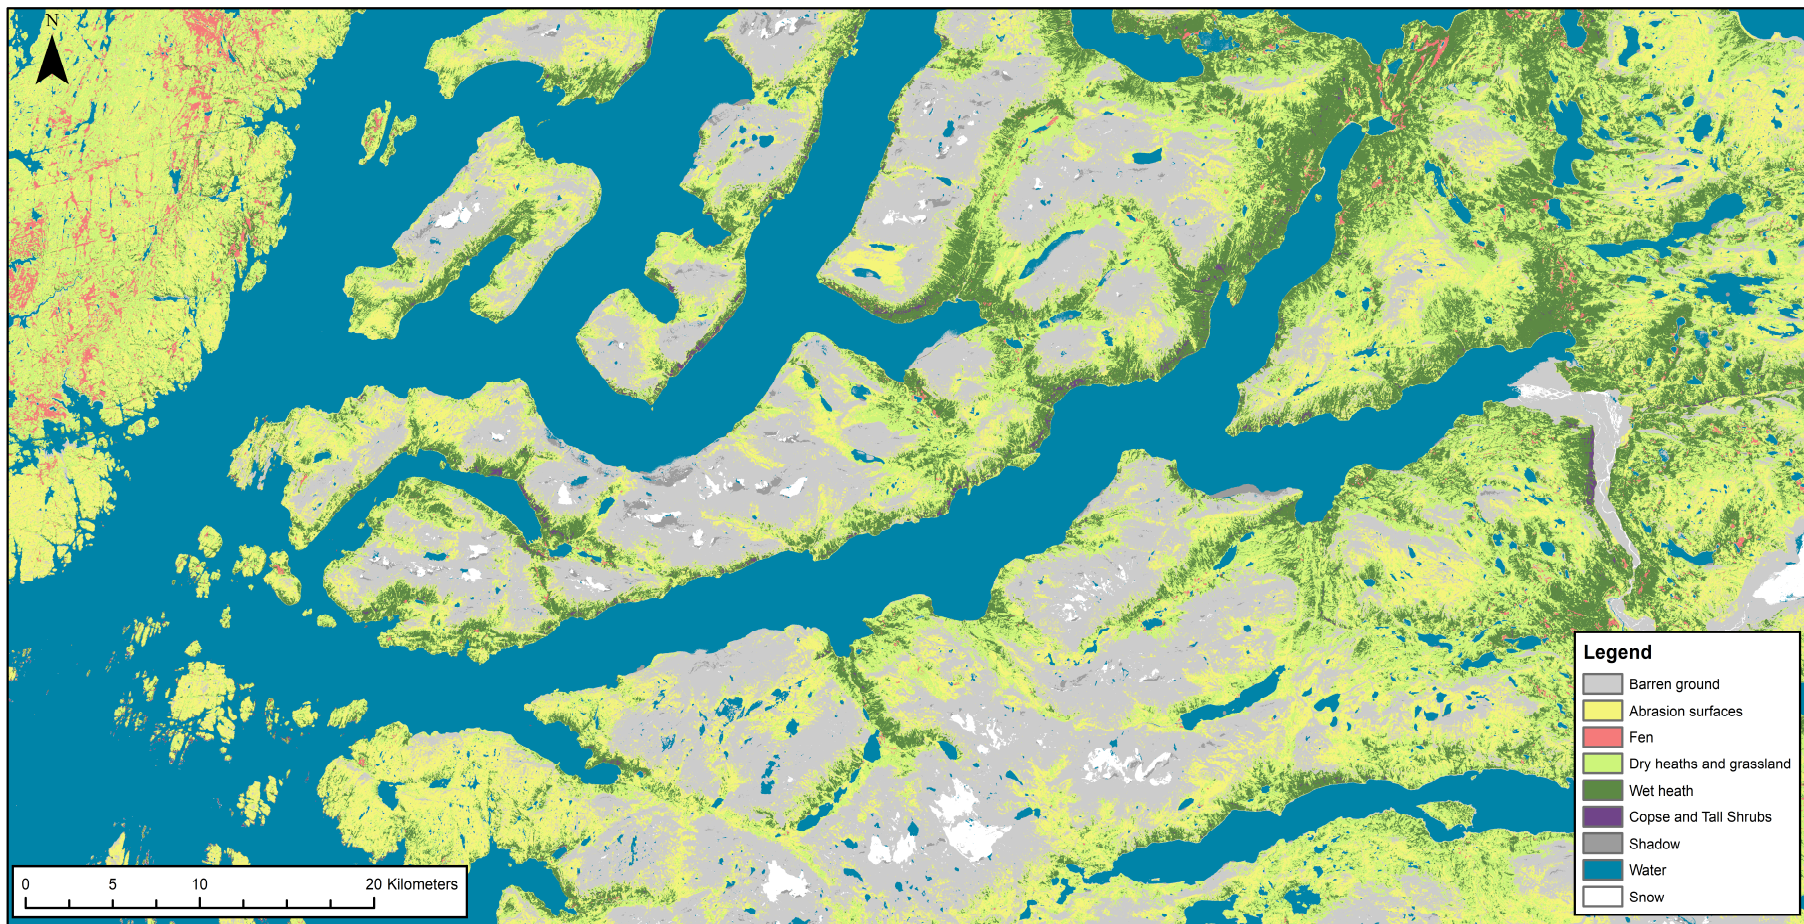

**Figure S5:** Final classification of the “Kobbefjord” area.

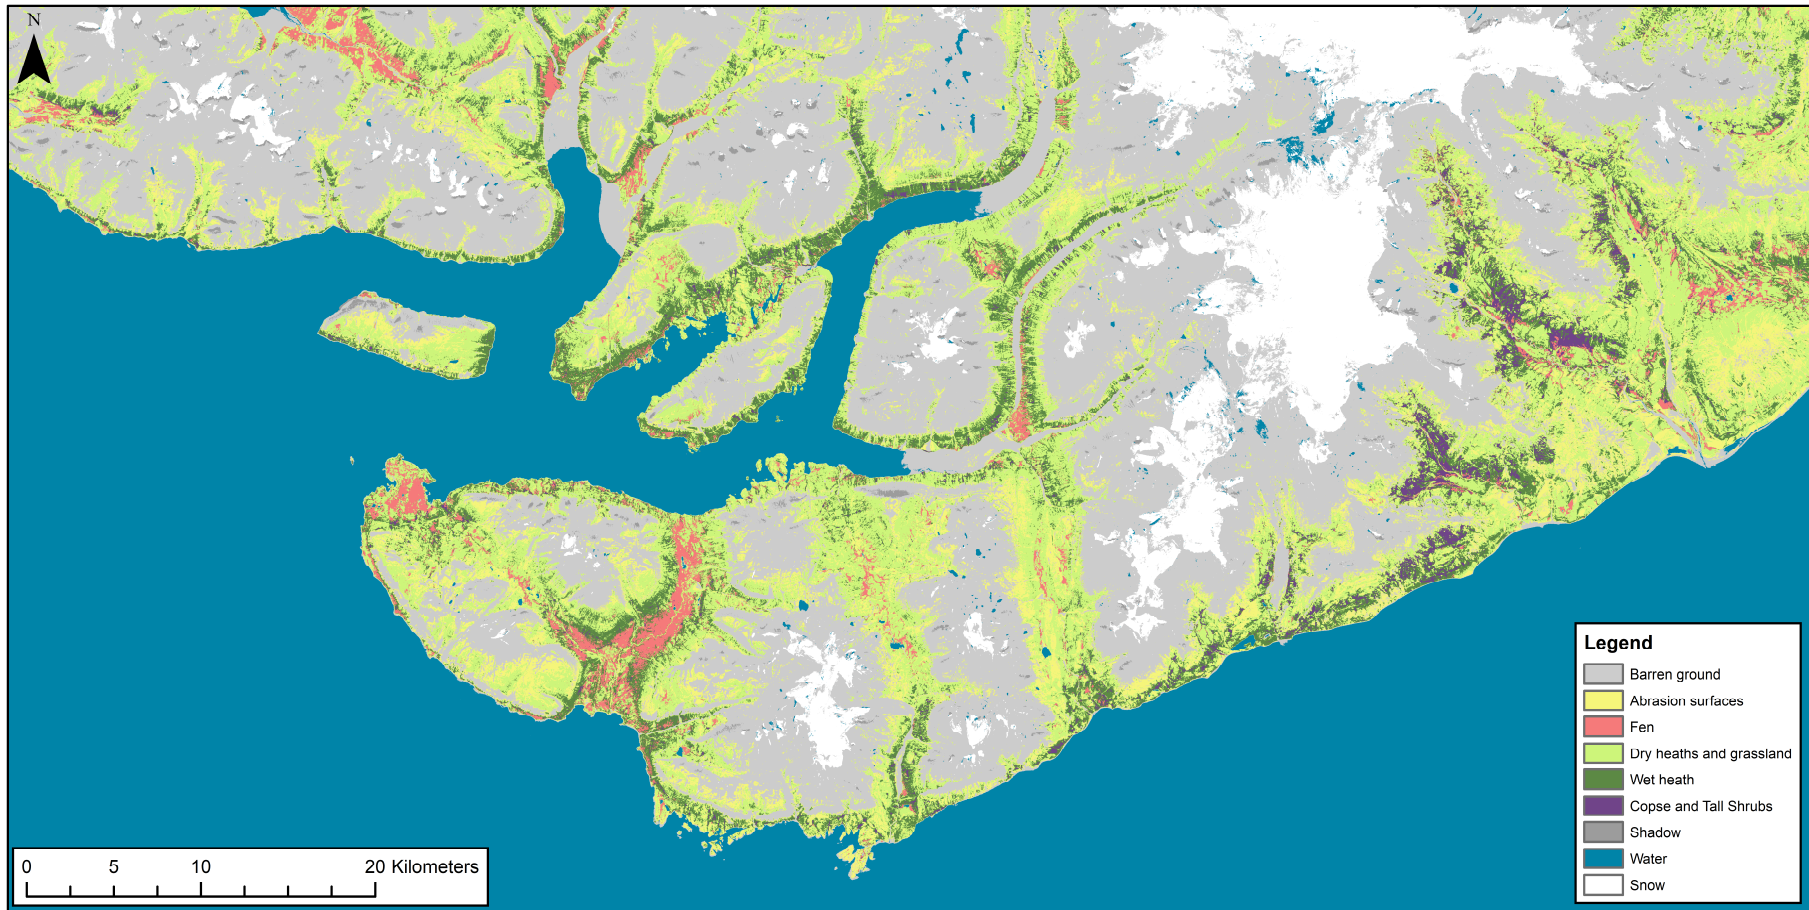

**Figure S6:** Final classification of the “Disko” area.

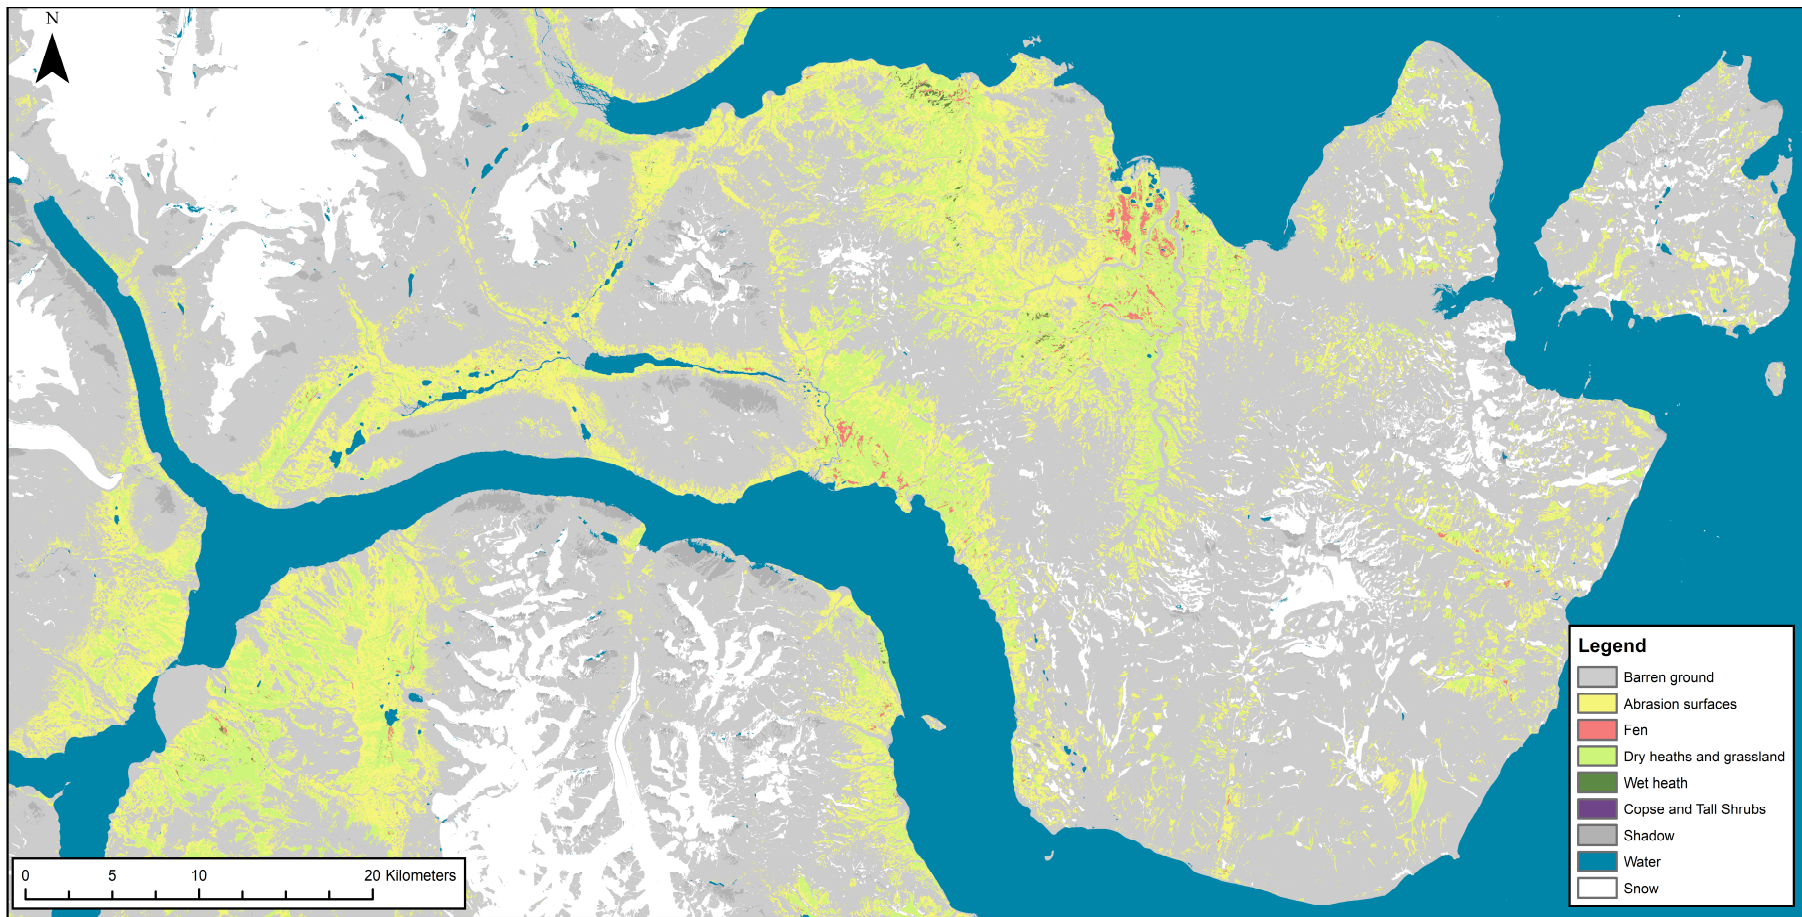

**Figure S7:** Final classification of the “Zackenberg” area.

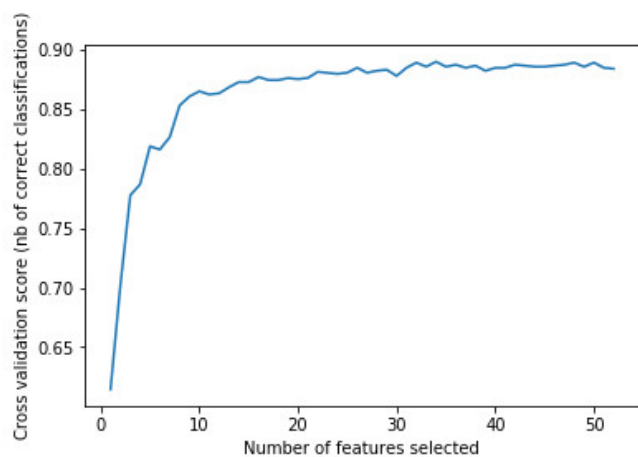

Figure S8: Output of the RFECV analysis without red-edge features.

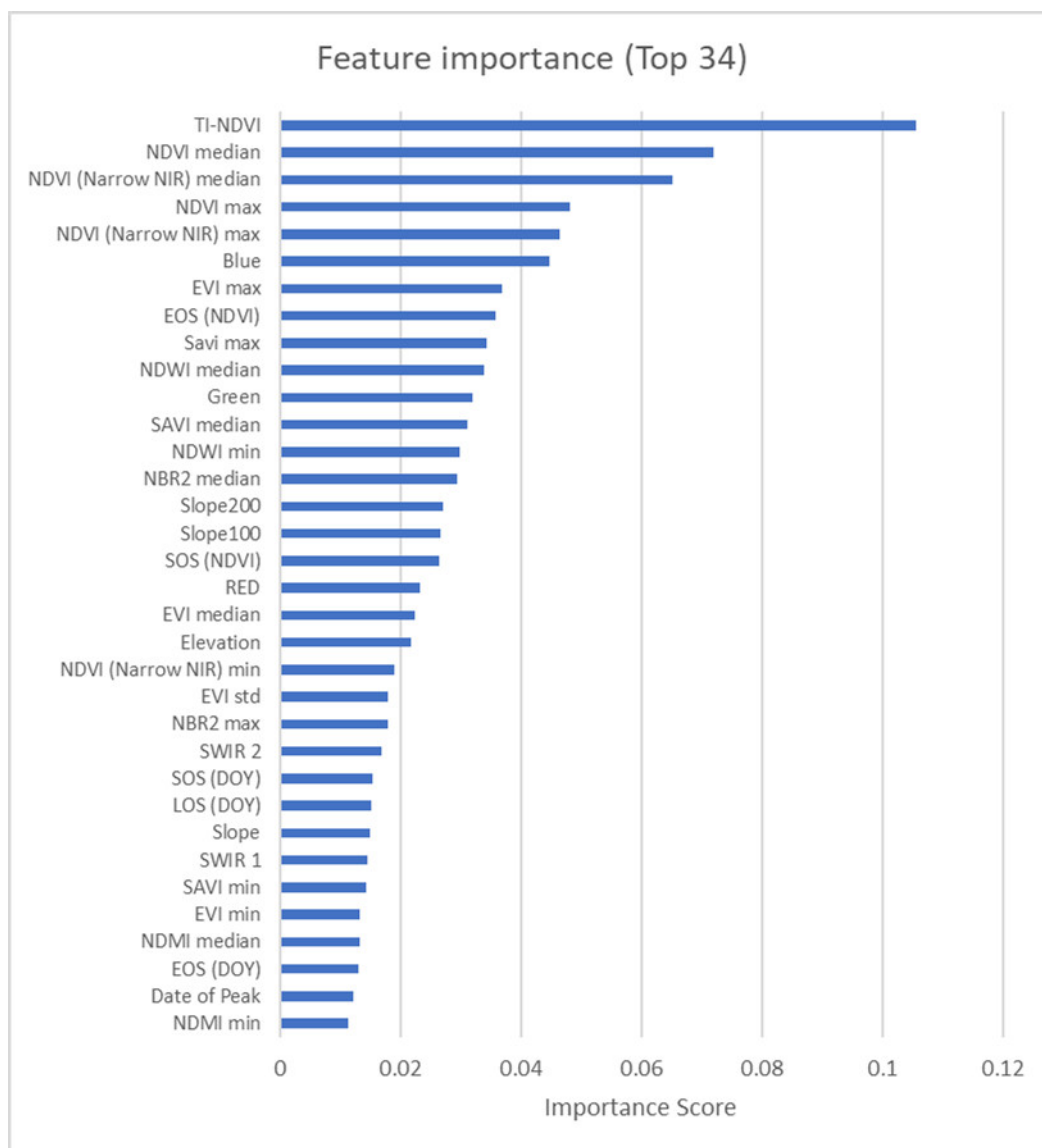

Figure S9: Results of the optimal combination of features (without red-edge).

**Table S3:** The confusion matrix of the optimal combination of features (without red-edge features) based on a 10-fold cross-validation.

|                  |                          | Reference     |                   |     |                          |           |                       | Total | Prod. acc. after proportion adjustment (%) | User's acc. after proportion adjustment (%) |
|------------------|--------------------------|---------------|-------------------|-----|--------------------------|-----------|-----------------------|-------|--------------------------------------------|---------------------------------------------|
|                  |                          | Barren ground | Abrasion surfaces | Fen | Dry heaths and grassland | Wet heath | Copse and Tall Shrubs |       |                                            |                                             |
| Predicted        | Barren ground            | 249           | 7                 | 0   | 0                        | 0         | 0                     | 256   | 96.9                                       | 97.3                                        |
|                  | Abrasion surfaces        | 17            | 126               | 0   | 14                       | 2         | 0                     | 159   | 85.1                                       | 79.2                                        |
|                  | Fen                      | 1             | 1                 | 180 | 8                        | 14        | 0                     | 204   | 70.4                                       | 88.2                                        |
|                  | Dry heaths and grassland | 0             | 7                 | 6   | 213                      | 16        | 2                     | 244   | 91.0                                       | 87.3                                        |
|                  | Wet heath                | 0             | 1                 | 17  | 10                       | 161       | 6                     | 195   | 77.6                                       | 82.6                                        |
|                  | Copse and Tall Shrubs    | 0             | 0                 | 0   | 1                        | 6         | 99                    | 106   | 53.4                                       | 93.4                                        |
|                  | Total                    | 267           | 142               | 203 | 246                      | 199       | 107                   | 1164  |                                            |                                             |
| Area-weighted OA |                          |               |                   |     |                          |           |                       | 91.0  |                                            |                                             |
